# Supplementary material for: Improving Theory of Mind in Schizophrenia by Targeting Cognition and Metacognition with Computerized Cognitive Remediation: A Multiple Case Study
Source: Hindawi journal article supplement (doi:10.1155/2017/7203871), 2017-01-01
Supplement: f1 [file 7203871.f1.zip]

## Supplementary material

Table S1. Clinical information for Case A at baseline, post-treatment and the two follow-ups

|                           | Case A                   |                  |                                 |                            |                          |                  |                        |                |                                         |                               |                             |
|---------------------------|--------------------------|------------------|---------------------------------|----------------------------|--------------------------|------------------|------------------------|----------------|-----------------------------------------|-------------------------------|-----------------------------|
|                           | Baseline<br>raw<br>score | Baseline<br>mean | Post-<br>treatment<br>raw score | Post-<br>treatment<br>mean | 3 months<br>raw<br>score | 3 months<br>mean | 1 year<br>raw<br>score | 1 year<br>mean | Baseline –<br>post-<br>treatment<br>RCI | Baseline –<br>3 months<br>RCI | Baseline –<br>1 year<br>RCI |
| GAF                       | 42                       | -                | <b>59</b>                       | -                          | 42                       | -                | 42                     | -              | <b>2.58*</b>                            | .00                           | .00                         |
| PANSS <sup>a</sup>        |                          |                  |                                 |                            |                          |                  |                        |                |                                         |                               |                             |
| Total                     | 63                       |                  | <b>36</b>                       | -                          | 57                       | -                | 60                     | -              | <b>3.77*</b>                            | .84                           | .42                         |
| Positive                  | 17                       | 2.8/7            | <b>7</b>                        | 1.2/7                      | 18                       | 3/7              | 18                     | 3/7            | <b>3.77*</b>                            | -.38                          | -.38                        |
| Negative                  | 17                       | 2.4/7            | <b>8</b>                        | 1.1/7                      | <b>12</b>                | 1.7/7            | 14                     | 2/7            | <b>2.90*</b>                            | 1.61                          | .97                         |
| Cognitive/Disorganization | 14                       | 2.8/7            | 13                              | 2.6/7                      | 13                       | 2.6/7            | 14                     | 2.8/7          | .36                                     | .36                           | .00                         |
| Depression/Anxiety        | 10                       | 2.5/7            | <b>4</b>                        | 1/7                        | 8                        | 2/7              | 8                      | 2/7            | <b>2.96*</b>                            | .99                           | .99                         |
| Excitability/Hostility    | 5                        | 1.3/7            | 4                               | 1/7                        | 6                        | 1.5/7            | 6                      | 1.5/7          | .47                                     | -.47                          | -.47                        |

\* RCI  $\geq 1.64$

GAF = Global Assessment of Functioning; PANSS = Positive and Negative Syndrome Scale

<sup>a</sup> PANSS RCIs are multiplied by -1. Therefore, a significant RCI indicates a decrease in the severity of the clinical symptoms.

Scores in bold for the PANSS indicate a clinical change after the treatment (a change of at least 25% compared to baseline). For the GAF, a score in bold indicates that the patient reached the remission criteria (59)

Table S2. ToM, cognition and metacognition raw scores, percentile ranks and RCIs for Case A at baseline, post-treatment and the two follow-ups

|                                                                   | Baseline<br>raw<br>score | Post-<br>treatment<br>raw score | 3 months<br>raw<br>score | 1 year<br>raw<br>score | Baseline<br>percentile | Post-<br>treatment<br>percentile | 3 months<br>percentile | 1 year<br>percentile | Baseline –<br>post-<br>treatment<br>RCI | Baseline –<br>3 months<br>RCI | Baseline –<br>1 year<br>RCI |
|-------------------------------------------------------------------|--------------------------|---------------------------------|--------------------------|------------------------|------------------------|----------------------------------|------------------------|----------------------|-----------------------------------------|-------------------------------|-----------------------------|
| <i>A. Social cognition</i>                                        |                          |                                 |                          |                        |                        |                                  |                        |                      |                                         |                               |                             |
| <i>ToM - Combined Stories Task (/52)</i>                          | 25                       | 30                              | 38                       | 35                     | <1                     | .10                              | 13                     | 3                    | 1.26                                    | <b>3.28*</b>                  | <b>2.52*</b>                |
| <i>B. Cognition</i>                                               |                          |                                 |                          |                        |                        |                                  |                        |                      |                                         |                               |                             |
| <i>Working memory – Digit span</i>                                | 16                       | 18                              | 11                       | 13                     | 25                     | 50                               | 5                      | 9                    | .81                                     | -2.03                         | -1.22                       |
| <i>Working memory – Spatial span</i>                              | 14                       | 14                              | 15                       | 10                     | 25                     | 25                               | 25                     | 2                    | .00                                     | .53                           | -2.14                       |
| <i>Episodic memory – CVLT delayed recall</i>                      | 7                        | 9                               | 6                        | 7                      | 7                      | 16                               | 2                      | 2                    | 1.06                                    | -.53                          | .00                         |
| <i>Episodic memory – RCFT delayed recall</i>                      | 6.5                      | 6                               | 5.5                      | 7                      | 1                      | 1                                | 1                      | 1                    | -.10                                    | -.21                          | .10                         |
| <i>Selective attention – CPT omission</i>                         | 0                        | 5                               | 13                       | 10                     | 79                     | 24                               | 1                      | 1                    | -.83                                    | -2.16                         | -1.66                       |
| <i>Selective attention – CPT commission</i>                       | 19                       | 16                              | 26                       | 22                     | 27                     | 41                               | 6                      | 13                   | .57                                     | -1.33                         | -.57                        |
| <i>Sustained attention – Hit reaction time</i>                    | .01                      | .03                             | .03                      | .03                    | 59                     | 21                               | 14                     | 12                   | -1.05                                   | -1.05                         | -1.05                       |
| <i>Sustained attention – Hit standard error</i>                   | .04                      | .12                             | .10                      | .14                    | 44                     | 6                                | 10                     | 3                    | -1.51                                   | -1.13                         | -1.88                       |
| <i>Reasoning – Matrix<sup>a</sup></i>                             | 9                        | 10                              | 11                       | 8                      | 37                     | 50                               | 63                     | 25                   | .61                                     | 1.22                          | -.61                        |
| <i>Cognitive flexibility – WCST – Total</i>                       | 3                        | 2                               | 1                        | 1                      | 2                      | 1                                | 1                      | 1                    | -.73                                    | -1.46                         | -1.46                       |
| <i>Categories</i>                                                 |                          |                                 |                          |                        |                        |                                  |                        |                      |                                         |                               |                             |
| <i>Inhibition – Stroop 3</i>                                      | 44.6                     | 47.75                           | 54.6                     | 51                     | 63                     | 63                               | 37                     | 50                   | -.26                                    | -.84                          | -.54                        |
| <i>Planning / Organization – TOL – Total</i>                      | 2                        | 1                               | 2                        | 1                      | 19                     | 8                                | 19                     | 8                    | -.63                                    | .00                           | -.63                        |
| <i>Correct</i>                                                    |                          |                                 |                          |                        |                        |                                  |                        |                      |                                         |                               |                             |
| <i>Metacognition regulation – BRIEF self GEC<sup>b</sup></i>      | 56                       | 51                              | 47                       | 43                     | 27                     | 47                               | 63                     | 75                   | .51                                     | .91                           | 1.32                        |
| <i>Metacognition regulation – BRIEF informant GEC<sup>b</sup></i> | 89                       | 64                              | 63                       | 65                     | <.01                   | 8                                | 9                      | 6                    | <b>3.27*</b>                            | <b>3.41*</b>                  | <b>3.14*</b>                |
| <i>Metacognition knowledge – SSTICS</i>                           | 21                       | 18                              | 16                       | 14                     | 62                     | 73                               | 79                     | 83                   | .77                                     | 1.28                          | <b>1.79*</b>                |

ToM = Theory of mind score of the Combined Stories Task; CVLT = California Verbal Learning Test –II; RCFT = Rey Complex Figure Test; CPT = Continuous Performance Test – II; WCST = Wisconsin Card Sorting Test -128 card; TOL = Tower Of London ; BRIEF – self GEC = Executive Global Index – self-report; BRIEF – informant GEC = Executive Global Index – informant report; SSTICS = Subjective Scale to Investigate Cognition in Schizophrenia

<sup>a</sup> Scaled scores with a mean of 10 and a standard deviation of 3.

<sup>b</sup> T scores with a mean of 50 and a standard deviation of 10.

Percentiles in bold indicate a clinical change after the treatment for the cognitive and metacognitive measures (a percentile that surpasses the 16<sup>th</sup> percentile compared to baseline)

\* RCI  $\geq 1.64$

Table S3. Clinical information for Case B at baseline, post-treatment and the two follow-ups

|                           | Case B                   |                  |                                 |                            |                       |                  |                     |                |                                         |                               |                             |
|---------------------------|--------------------------|------------------|---------------------------------|----------------------------|-----------------------|------------------|---------------------|----------------|-----------------------------------------|-------------------------------|-----------------------------|
|                           | Baseline<br>raw<br>score | Baseline<br>mean | Post-<br>treatment<br>raw score | Post-<br>treatment<br>mean | 3 months<br>raw score | 3 months<br>mean | 1 year<br>raw score | 1 year<br>mean | Baseline –<br>post-<br>treatment<br>RCI | Baseline –<br>3 months<br>RCI | Baseline –<br>1 year<br>RCI |
| GAF                       | 38                       | -                | 40                              | -                          | 43                    | -                | 43                  | -              | .30                                     | .76                           | .76                         |
| PANSS <sup>a</sup>        |                          |                  |                                 |                            |                       |                  |                     |                |                                         |                               |                             |
| Total                     | 87                       | 3.29/7           | 66                              | -                          | 68                    | -                | 68                  | -              | <b>2.94*</b>                            | <b>2.66*</b>                  | <b>2.66*</b>                |
| Positive                  | 32                       | 5.3/7            | <b>24</b>                       | 4/7                        | 27                    | 4.5/7            | 27                  | 4.5/7          | <b>3.01*</b>                            | <b>1.88*</b>                  | <b>1.88*</b>                |
| Negative                  | 19                       | 2.7/7            | 18                              | 2.6/7                      | 18                    | 2.6/7            | 18                  | 2.6/7          | .32                                     | .32                           | .32                         |
| Cognitive/Disorganization | 20                       | 4/7              | <b>12</b>                       | 2.4/7                      | <b>12</b>             | 2.4/7            | <b>12</b>           | 2.4/7          | <b>2.88*</b>                            | <b>2.88*</b>                  | <b>2.88*</b>                |
| Depression/Anxiety        | 8                        | 2/7              | 7                               | 1.8/7                      | 7                     | 1.8/7            | 7                   | 1.8/7          | .49                                     | .49                           | .49                         |
| Excitability/Hostility    | 8                        | 2/7              | <b>5</b>                        | 1.3/7                      | <b>4</b>              | 1/7              | <b>4</b>            | 1/7            | 1.40                                    | <b>1.86*</b>                  | <b>1.86*</b>                |

\* RCI  $\geq$  1.64

GAF = Global Assessment of Functioning; PANSS = Positive and Negative Syndrome Scale

<sup>a</sup> PANSS RCIs are multiplied by -1. Therefore, a significant RCI indicates a decrease in the severity of the clinical symptoms.

Scores in bold for the PANSS indicate a clinical change after the treatment (a change of at least 25% compared to baseline). For the GAF, a score in bold indicates that the patient reached the remission criteria (59)

Table S4. ToM, cognition and metacognition raw scores, percentile ranks and RCIs for Case B at baseline, post-treatment and the two follow-ups

|                                                                    | Baseline<br>raw<br>score | Post-<br>treatment<br>raw score | 3 months<br>raw<br>score | 1 year<br>raw<br>score | Baseline<br>Percentile | Post –<br>treatment<br>percentile | 3 months<br>percentile | 1 year<br>Percentile | Baseline –<br>post-<br>treatment<br>RCI | Baseline –<br>3 months<br>RCI | Baseline –<br>1 year<br>RCI |
|--------------------------------------------------------------------|--------------------------|---------------------------------|--------------------------|------------------------|------------------------|-----------------------------------|------------------------|----------------------|-----------------------------------------|-------------------------------|-----------------------------|
| <i>A. Social cognition</i>                                         |                          |                                 |                          |                        |                        |                                   |                        |                      |                                         |                               |                             |
| <i>ToM</i> - Combined Stories Task (/52)                           | 23                       | 30                              | 32                       | 31                     | <.10                   | .10                               | 1                      | .20                  | <b>1.77*</b>                            | <b>2.27*</b>                  | <b>2.02*</b>                |
| <i>B. Cognition</i>                                                |                          |                                 |                          |                        |                        |                                   |                        |                      |                                         |                               |                             |
| <i>Working memory</i> – Digit span                                 | 12                       | 11                              | 12                       | 11                     | 5                      | 5                                 | 9                      | 5                    | -.41                                    | .00                           | -.41                        |
| <i>Working memory</i> – Spatial span                               | 13                       | 13                              | 10                       | 15                     | 16                     | 16                                | 2                      | <b>25</b>            | .00                                     | -1.60                         | 1.07                        |
| <i>Episodic memory</i> – CVLT delayed recall                       | 6                        | 9                               | 7                        | 5                      | 2                      | 16                                | 7                      | 1                    | 1.60                                    | .53                           | -.53                        |
| <i>Episodic memory</i> – RCFT delayed recall                       | 7                        | 16.5                            | 14                       | 19.5                   | 1                      | 4                                 | 1                      | 14                   | <b>1.97*</b>                            | 1.45                          | <b>2.59*</b>                |
| <i>Selective attention</i> – CPT omission                          | 1                        | 1                               | 3                        | NA                     | 70                     | 70                                | 46                     | NA                   | .00                                     | -.33                          | NA                          |
| <i>Selective attention</i> – CPT commission                        | 27                       | 17                              | 23                       | NA                     | 5                      | <b>36</b>                         | 13                     | NA                   | <b>1.90*</b>                            | .76                           | NA                          |
| <i>Sustained attention</i> – Hit reaction time                     | .02                      | .01                             | .01                      | NA                     | 23                     | 32                                | 43                     | NA                   | .53                                     | .53                           | NA                          |
| Block change                                                       |                          |                                 |                          |                        |                        |                                   |                        |                      |                                         |                               |                             |
| <i>Sustained attention</i> – Hit standard error                    | .13                      | .06                             | .04                      | NA                     | 5                      | <b>19</b>                         | <b>29</b>              | NA                   | 1.32                                    | <b>1.69*</b>                  | NA                          |
| Block change                                                       |                          |                                 |                          |                        |                        |                                   |                        |                      |                                         |                               |                             |
| <i>Reasoning</i> – Matrix <sup>a</sup>                             | 9                        | 7                               | 10                       | 11                     | 37                     | 16                                | 50                     | 63                   | -1.22                                   | .61                           | 1.22                        |
| <i>Cognitive flexibility</i> – WCST – Total                        | 2                        | .00                             | .00                      | 1                      | 1                      | 1                                 | 1                      | 1                    | -1.46                                   | -1.46                         | -.73                        |
| Categories                                                         |                          |                                 |                          |                        |                        |                                   |                        |                      |                                         |                               |                             |
| <i>Inhibition</i> – Stroop 3                                       | 48                       | 40                              | 46                       | 48                     | 63                     | 84                                | 63                     | 63                   | .67                                     | .17                           | .00                         |
| <i>Planning / Organization</i> – TOL – Total                       | 2                        | 5                               | 5                        | 3                      | 19                     | 60                                | 60                     | 33                   | <b>1.89*</b>                            | <b>1.89*</b>                  | .63                         |
| Correct                                                            |                          |                                 |                          |                        |                        |                                   |                        |                      |                                         |                               |                             |
| <i>Metacognition regulation</i> – BRIEF self GEC <sup>b</sup>      | 54                       | 44                              | 46                       | 53                     | 33                     | 72                                | 66                     | 37                   | 1.01                                    | .81                           | .10                         |
| <i>Metacognition regulation</i> – BRIEF informant GEC <sup>b</sup> | 65                       | 64                              | 60                       | 64                     | 6                      | 8                                 | 16                     | 8                    | .13                                     | .66                           | .13                         |
| <i>Metacognition knowledge</i> – SSTICS                            | 15                       | 25                              | 20                       | 34                     | 81                     | 52                                | 66                     | 27                   | -2.55                                   | -1.28                         | -4.85                       |

ToM = Theory of mind score of the Combined Stories Task; CVLT = California Verbal Learning Test –II; RCFT = Rey Complex Figure Test; CPT = Continuous Performance Test – II; WCST = Wisconsin Card Sorting Test -128 card; TOL = Tower Of London ; BRIEF – self GEC = Executive Global Index – self-report; BRIEF – informant GEC = Executive Global Index – informant report; SSTICS = Subjective Scale to Investigate Cognition in Schizophrenia

<sup>a</sup> Scaled scores with a mean of 10 and a standard deviation of 3.

<sup>b</sup> T scores with a mean of 50 and a standard deviation of 10.

Percentiles in bold indicate a clinical change after the treatment for the cognitive and metacognitive measures (a percentile that surpasses the 16<sup>th</sup> percentile compared to baseline)

\* RCI ≥ 1.64

Table S5. Clinical information for Case C at baseline, post-treatment and the two follow-ups

|                           | Case C                |                  |                                 |                            |                       |                  |                        |                |                                         |                               |                             |
|---------------------------|-----------------------|------------------|---------------------------------|----------------------------|-----------------------|------------------|------------------------|----------------|-----------------------------------------|-------------------------------|-----------------------------|
|                           | Baseline<br>raw score | Baseline<br>mean | Post-<br>treatment<br>raw score | Post-<br>treatment<br>mean | 3 months<br>raw score | 3 months<br>mean | 1 year<br>raw<br>score | 1 year<br>mean | Baseline –<br>post-<br>treatment<br>RCI | Baseline –<br>3 months<br>RCI | Baseline –<br>1 year<br>RCI |
| GAF                       | 45                    | -                | 45                              | -                          | 45                    | -                | NA                     | -              | .00                                     | .00                           | NA                          |
| PANSS <sup>a</sup>        |                       |                  |                                 |                            |                       |                  |                        |                |                                         |                               |                             |
| Total                     | 52                    | 1.9/7            | 49                              | -                          | 49                    | -                | NA                     | -              | .42                                     | .42                           | NA                          |
| Positive                  | 8                     | 1.3/7            | 8                               | 1.3/7                      | 8                     | 1.3/7            | NA                     | NA             | .00                                     | .00                           | NA                          |
| Negative                  | 22                    | 3.1/7            | 20                              | 2.9/7                      | 20                    | 2.9/7            | NA                     | NA             | .65                                     | .65                           | NA                          |
| Cognitive/Disorganization | 11                    | 2.2/7            | 10                              | 2/7                        | 10                    | 2/7              | NA                     | NA             | .36                                     | .36                           | NA                          |
| Depression/Anxiety        | 7                     | 1.8/7            | 7                               | 1.8/7                      | 7                     | 1.8/7            | NA                     | NA             | .00                                     | .00                           | NA                          |
| Excitability/Hostility    | 4                     | 1/7              | 4                               | 1/7                        | 4                     | 1/7              | NA                     | NA             | .00                                     | .00                           | NA                          |

\* RCI  $\geq$  1.64

GAF = Global Assessment of Functioning; PANSS = Positive and Negative Syndrome Scale

<sup>a</sup> PANSS RCIs are multiplied by -1. Therefore, a significant RCI indicates a decrease in the severity of the clinical symptoms.

Scores in bold for the PANSS indicate a clinical change after the treatment (a change of at least 25% compared to baseline). For the GAF, a score in bold indicates that the patient reached the remission criteria (59)

Table S6. ToM, cognition and metacognition raw scores, percentile ranks and RCIs for Case C at baseline, post-treatment and the two follow-ups

|                                                                   | Baseline<br>raw<br>score | Post-<br>treatment<br>raw score | 3 months<br>raw<br>score | 1 year<br>raw<br>score | Baseline<br>percentile | Post-<br>treatment<br>percentile | 3 months<br>percentile | 1 year<br>percentile | Baseline –<br>post-<br>treatment<br>RCI | Baseline –<br>3 months<br>RCI | Baseline –<br>1 year<br>RCI |
|-------------------------------------------------------------------|--------------------------|---------------------------------|--------------------------|------------------------|------------------------|----------------------------------|------------------------|----------------------|-----------------------------------------|-------------------------------|-----------------------------|
| <i>A. Social cognition</i>                                        |                          |                                 |                          |                        |                        |                                  |                        |                      |                                         |                               |                             |
| <i>ToM - Combined Stories Task (/52)</i>                          | 37                       | 44                              | 46                       | NA                     | 8                      | 51                               | 51                     | NA                   | <b>1.77*</b>                            | <b>2.27*</b>                  | NA                          |
| <i>B. Cognition</i>                                               |                          |                                 |                          |                        |                        |                                  |                        |                      |                                         |                               |                             |
| <i>Working memory – Digit span</i>                                | 28                       | 15                              | 17                       | NA                     | 25                     | 25                               | 37                     | NA                   | -5.27                                   | -4.46                         | NA                          |
| <i>Working memory – Spatial span</i>                              | 15                       | 13                              | 11                       | NA                     | 25                     | 16                               | 5                      | NA                   | -1.07                                   | -2.14                         | NA                          |
| <i>Episodic memory – CVLT delayed recall</i>                      | 11                       | 10                              | 11                       | NA                     | 32                     | 7                                | 50                     | NA                   | -.53                                    | .00                           | NA                          |
| <i>Episodic memory – RCFT delayed recall</i>                      | 8                        | 3                               | 3.5                      | NA                     | 1                      | 1                                | 1                      | NA                   | -1.04                                   | -.93                          | NA                          |
| <i>Selective attention – CPT omission</i>                         | 17                       | 5                               | 5                        | NA                     | 1                      | <b>24</b>                        | <b>24</b>              | NA                   | <b>1.99*</b>                            | <b>1.99*</b>                  | NA                          |
| <i>Selective attention – CPT commission</i>                       | 27                       | 23                              | 20                       | NA                     | 5                      | 13                               | <b>23</b>              | NA                   | .76                                     | 1.33                          | NA                          |
| <i>Sustained attention – Hit reaction time</i>                    | -.02                     | .00                             | .01                      | NA                     | 77                     | 51                               | 38                     | NA                   | -1.05                                   | -1.58                         | NA                          |
| Block change                                                      |                          |                                 |                          |                        |                        |                                  |                        |                      |                                         |                               |                             |
| <i>Sustained attention – Hit standard error</i>                   | .02                      | .06                             | .07                      | NA                     | 44                     | 22                               | 19                     | NA                   | -.75                                    | -.94                          | NA                          |
| Block change                                                      |                          |                                 |                          |                        |                        |                                  |                        |                      |                                         |                               |                             |
| <i>Reasoning – Matrix<sup>a</sup></i>                             | 4                        | 3                               | 10                       | NA                     | 2                      | 1                                | <b>50</b>              | NA                   | -.61                                    | <b>3.65*</b>                  | NA                          |
| <i>Cognitive flexibility – WCST – Total</i>                       | 4                        | 6                               | 6                        | NA                     | 11                     | <b>16</b>                        | <b>16</b>              | NA                   | 1.46                                    | 1.46                          | NA                          |
| Categories                                                        |                          |                                 |                          |                        |                        |                                  |                        |                      |                                         |                               |                             |
| <i>Inhibition – Stroop 3</i>                                      | 50                       | 47                              | 53                       | NA                     | 50                     | 63                               | 37                     | NA                   | .25                                     | -.25                          | NA                          |
| <i>Planning / Organization – TOL – Total</i>                      | 4                        | 3                               | 1                        | NA                     | 47                     | 33                               | 8                      | NA                   | -.63                                    | -1.89                         | NA                          |
| Correct                                                           |                          |                                 |                          |                        |                        |                                  |                        |                      |                                         |                               |                             |
| <i>Metacognition regulation – BRIEF self GEC<sup>b</sup></i>      | 50                       | 61                              | 68                       | NA                     | 50                     | 14                               | 3                      | NA                   | -1.11                                   | -1.82                         | NA                          |
| <i>Metacognition regulation – BRIEF informant GEC<sup>b</sup></i> | 51                       | 68                              | 66                       | NA                     | 47                     | 3                                | 5                      | NA                   | -2.23                                   | -1.96                         | NA                          |
| <i>Metacognition knowledge – SSTICS</i>                           | 2                        | 11                              | 8                        | NA                     | 97                     | 86                               | 90                     | NA                   | -2.30                                   | -1.53                         | NA                          |

ToM = Theory of mind score of the Combined Stories Task; CVLT = California Verbal Learning Test –II; RCFT = Rey Complex Figure Test; CPT = Continuous Performance Test – II; WCST = Wisconsin Card Sorting Test -128 card; TOL = Tower Of London ; BRIEF – self GEC = Executive Global Index – self-report; BRIEF – informant GEC = Executive Global Index – informant report; SSTICS = Subjective Scale to Investigate Cognition in Schizophrenia

<sup>a</sup> Scaled scores with a mean of 10 and a standard deviation of 3.

<sup>b</sup> T scores with a mean of 50 and a standard deviation of 10.

Percentiles in bold indicate a clinical change after the treatment for the cognitive and metacognitive measures (a percentile that surpasses the 16<sup>th</sup> percentile compared to baseline)

\* RCI  $\geq 1.64$

Table S7. Clinical information for Case D at baseline, post-treatment and the two follow-ups

|                           | Case D             |               |                          |                     |                    |               |                  |             |                               |                         |                       |
|---------------------------|--------------------|---------------|--------------------------|---------------------|--------------------|---------------|------------------|-------------|-------------------------------|-------------------------|-----------------------|
|                           | Baseline raw score | Baseline mean | Post-treatment raw score | Post-treatment mean | 3 months raw score | 3 months mean | 1 year raw score | 1 year mean | Baseline – post-treatment RCI | Baseline – 3 months RCI | Baseline – 1 year RCI |
| GAF                       | 48                 | -             | 48                       | -                   | NA                 | NA            | NA               | NA          | .00                           | NA                      | NA                    |
| PANSS <sup>a</sup>        |                    |               |                          |                     |                    |               |                  |             |                               |                         |                       |
| Total                     | 71                 | 2.7/7         | 62                       | -                   | NA                 | NA            | NA               | NA          | 1.26                          | NA                      | NA                    |
| Positive                  | 13                 | 2.2/7         | 14                       | 2.3/7               | NA                 | NA            | NA               | NA          | -.38                          | NA                      | NA                    |
| Negative                  | 24                 | 3.4/7         | 22                       | 3.1/7               | NA                 | NA            | NA               | NA          | .65                           | NA                      | NA                    |
| Cognitive/Disorganization | 16                 | 3.2/7         | <b>12</b>                | 2.4/7               | NA                 | NA            | NA               | NA          | 1.44                          | NA                      | NA                    |
| Depression/Anxiety        | 14                 | 3.5/7         | <b>10</b>                | 2.5/7               | NA                 | NA            | NA               | NA          | <b>1.98*</b>                  | NA                      | NA                    |
| Excitability/Hostility    | 4                  | 1/7           | 4                        | 1/7                 | NA                 | NA            | NA               | NA          | .00                           | NA                      | NA                    |

\* RCI  $\geq$  1.64

GAF = Global Assessment of Functioning; PANSS = Positive and Negative Syndrome Scale

<sup>a</sup> PANSS RCIs are multiplied by -1. Therefore, a significant RCI indicates a decrease in the severity of the clinical symptoms.

Scores in bold for the PANSS indicate a clinical change after the treatment (a change of at least 25% compared to baseline). For the GAF, a score in bold indicates that the patient reached the remission criteria (59)

Table S8. ToM, cognition and metacognition raw scores, percentile ranks and RCIs for Case D at baseline, post-treatment and the two follow-ups

|                                                                   | Baseline<br>raw<br>score | Post-<br>treatment<br>raw score | 3 months<br>raw<br>score | 1 year<br>raw<br>Score | Baseline<br>percentile | Post-<br>treatment<br>percentile | 3 months<br>percentile | 1 year<br>percentile | Baseline –<br>post-<br>treatment<br>RCI | Baseline –<br>3 months<br>RCI | Baseline –<br>1 year<br>RCI |
|-------------------------------------------------------------------|--------------------------|---------------------------------|--------------------------|------------------------|------------------------|----------------------------------|------------------------|----------------------|-----------------------------------------|-------------------------------|-----------------------------|
| <i>A. Social cognition</i>                                        | 39                       | 44                              | 47                       | 50                     | 16                     | 51                               | 75                     | 91                   | 1.26                                    | <b>2.02*</b>                  | <b>2.78*</b>                |
| <i>ToM - Combined Stories Task (/52)</i>                          |                          |                                 |                          |                        |                        |                                  |                        |                      |                                         |                               |                             |
| <i>B. Cognition</i>                                               |                          |                                 |                          |                        |                        |                                  |                        |                      |                                         |                               |                             |
| <i>Working memory – Digit span</i>                                | 16                       | 18                              | 20                       | 20                     | 37                     | 50                               | 75                     | 75                   | .81                                     | 1.62                          | 1.62                        |
| <i>Working memory – Spatial span</i>                              | 20                       | 18                              | 18                       | 16                     | 84                     | 63                               | 63                     | 50                   | -1.07                                   | -1.07                         | -2.14                       |
| <i>Episodic memory – CVLT delayed recall</i>                      | 14                       | 14                              | 16                       | 16                     | 70                     | 70                               | 94                     | 93                   | .00                                     | 1.06                          | 1.06                        |
| <i>Episodic memory – RCFT delayed recall</i>                      | 11                       | 20                              | 22                       | 17.5                   | 1                      | <b>24</b>                        | <b>38</b>              | 10                   | <b>1.86*</b>                            | <b>2.28*</b>                  | 1.35                        |
| <i>Selective attention – CPT omission</i>                         | 0                        | 1                               | 1                        | .00                    | 79                     | 70                               | 70                     | 79                   | -.17                                    | -.17                          | .00                         |
| <i>Selective attention – CPT commission</i>                       | 11                       | 14                              | 10                       | 16                     | 63                     | 48                               | 71                     | 35                   | -.57                                    | .19                           | -.95                        |
| <i>Sustained attention – Hit reaction time</i>                    | .05                      | .02                             | -.01                     | .04                    | 3                      | <b>25</b>                        | <b>62</b>              | 9                    | 1.58                                    | <b>3.16*</b>                  | .53                         |
| Block change                                                      |                          |                                 |                          |                        |                        |                                  |                        |                      |                                         |                               |                             |
| <i>Sustained attention – Hit standard error</i>                   | .03                      | .00                             | -.03                     | .04                    | 38                     | 53                               | 62                     | 33                   | .56                                     | 1.13                          | -.19                        |
| Block change                                                      |                          |                                 |                          |                        |                        |                                  |                        |                      |                                         |                               |                             |
| <i>Reasoning – Matrix<sup>a</sup></i>                             | 9                        | 13                              | 10                       | 13                     | 37                     | 84                               | 50                     | 84                   | <b>2.43*</b>                            | .61                           | <b>2.43*</b>                |
| <i>Cognitive flexibility – WCST – Total</i>                       | 6                        | 6                               | 6                        | 6                      | 16                     | 16                               | 16                     | 16                   | .00                                     | .00                           | .00                         |
| Categories                                                        |                          |                                 |                          |                        |                        |                                  |                        |                      |                                         |                               |                             |
| <i>Inhibition – Stroop 3</i>                                      | 66                       | 64                              | 54                       | 56                     | 16                     | 16                               | <b>50</b>              | <b>37</b>            | .17                                     | 1.00                          | .84                         |
| <i>Planning / Organization – TOL – Total</i>                      | 4                        | 1                               | .00                      | 5                      | 40                     | 9                                | 1                      | 51                   | -1.89                                   | -2.52                         | .63                         |
| Correct                                                           |                          |                                 |                          |                        |                        |                                  |                        |                      |                                         |                               |                             |
| <i>Metacognition regulation – BRIEF self GEC<sup>b</sup></i>      | 60                       | 59                              | 59                       | NA                     | 16                     | <b>18</b>                        | <b>18</b>              | NA                   | .10                                     | .10                           | NA                          |
| <i>Metacognition regulation – BRIEF informant GEC<sup>b</sup></i> | 56                       | 52                              | 52                       | NA                     | 27                     | 45                               | 45                     | NA                   | .52                                     | .52                           | NA                          |
| <i>Metacognition knowledge – SSTICS</i>                           | 41                       | 36                              | 37                       | NA                     | 14                     | <b>19</b>                        | <b>18</b>              | NA                   | 1.28                                    | 1.02                          | NA                          |

ToM = Theory of mind score of the Combined Stories Task; CVLT = California Verbal Learning Test –II; RCFT = Rey Complex Figure Test; CPT = Continuous Performance Test – II; WCST = Wisconsin Card Sorting Test -128 card; TOL = Tower Of London ; BRIEF – self GEC = Executive Global Index – self-report; BRIEF – informant GEC = Executive Global Index – informant report; SSTICS = Subjective Scale to Investigate Cognition in Schizophrenia

<sup>a</sup> Scaled scores with a mean of 10 and a standard deviation of 3.

<sup>b</sup> T scores with a mean of 50 and a standard deviation of 10.

Percentiles in bold indicate a clinical change after the treatment for the cognitive and metacognitive measures (a percentile that surpasses the 16<sup>th</sup> percentile compared to baseline)

\* RCI ≥ 1.64
