# Supplementary material for: Improving Theory of Mind in Schizophrenia by Targeting Cognition and Metacognition with Computerized Cognitive Remediation: A Multiple Case Study
Source: Schizophr Res Treatment. 2017 Jan 26;2017:7203871. doi: 10.1155/2017/7203871 (PMC5299218; doi:10.1155/2017/7203871)
Supplement: Supplementary file 1 — Supplementary Material provides detailed results for ToM, neuropsychological, metacognitive and clinical measures, including raw scores, percentiles and RCIs for each case. [file 7203871.f1.zip]

Archive with 2 entries (2 files):
- Supplementary material - Submission CRP 01-08-2016.docx
- Supplementary material - Submission CRP 01-08-2016.pdf
